# Supplementary material
Source: publisher site journal article supplement (https://www.dovepress.com/article/391349)
Supplement: Supplementary file 1 [file get_supplementary_file.php]

**Table S1. Primers used in this study.**

| **Target genes** | **Primer sequence (5'-3')** | **Amplicon size (bp)** |
| --- | --- | --- |
| **Capsular serotypes** |  |  |
| K1 | F:GTAGGTATTGCAAGCCATGC R:GCCCAGGTTAATGAATCCGT | 1047 |
| K2 | F:GACCCGATATTCATACTTGACAGAG  R:CCTGAAGTAAAATCGTAAATAGATGGC | 641 |
| K5 | F:TGGTAGTGATGCTCGCGA  R:CCTGAACCCACCCCAATC | 280 |
| K20 | F:CGGTGCTACAGTGCATCATT  R:GTTATACGATGCTCAGTCGC | 741 |
| K54 | F:CATTAGCTCAGTGGTTGGCT  R:GCTTGACAAACACCATAGCAG | 881 |
| K57 | F:CTCAGGGCTAGAAGTGTCAT  R:CACTAACCCAGAAAGTCGAG | 1037 |
| **Virulence genes** |  |  |
| rmpA | F:GGTGCTCTTTACATCATTGC  R: GCAATGGCCATTTGCGTTAG | 1280 |
| wcaG | F:GGTTGGKTCAGCAATCGTA  R:ACTATTCCGCCAACTTTTGC | 169 |
| magA | F:GGTGCTCTTTACATCATTGC  R:GCAATGGCCATTTGCGTTAG | 1283 |
| aerobactin | F:GCATAGGCGGATACGAACAT  R:CACAGGGCAATTGCTTACCT | 556 |
| iro | F:GGCTACTGATACTTGACTATTC  R:CAGGATACAATAGCCCATAG | 992 |
| irp1 | F: TGAATCGCGGGTGTCTTATGC  R: TCCCTCAATAAAGCCCACGCT | 238 |
| entB | F: CTGCTGGGAAAAGCGATTGTC  R: AAGGCGACTCAGGAGTGGCTT | 385 |
| kfu | F:GAAGTGACGCTGTTTCTGGC  R:TTTCGTGTGGCCAGTGACTC | 797 |
| alls | F:CCGAAACATTACGCACCTTT  R:ATCACGAAGAGCCAGGTCAC | 508 |
| clbA | F:CTAGATTATCCGTGGCGATTC  R:CAGATACACAGATACCATTCA | 1311 |
| clbB | F: GATTTGGATACTGGCGATAACCG  R: CCATTTCCCGTTTGAGCACAC | 579 |
| clbN | F: GTTTTGCTCGCCAGATAGTCATTC  R: CAGTTCGGGTATGTGTGGAAGG | 733 |
| **Real-time PCR** |  |  |
| rmpA | *rmpA*-qF: CCATTATCCACGGCTAAC  *rmpA*-qR: TTGTTATCTTGCTTCGGTAG | 134 |
| ompA | *ompA*-qF: TGTTGCCAGTAACCGGGTTGG  *ompA*-qR: CGAAAGACGGTTCCGCTGTTG | 139 |
| clbB | *clbB*-qF: GCGCATCCTCAAGAGTAAATA  *clbB*-qR: GCGCTCTATGCTCATCAACC | 282 |

**Table S2**: Serotype and virulence genes expression of the three clinical isolates.

| **Isolate** | **Serotype** | **Virulence genes** |
| --- | --- | --- |
| KP133 | K1 | *wcaG*, *magA*, *rmpA*, *kfu*, *iro*, *entB*, *irp1, aero, alls,* *clbA*, *clbB,* *clbN* |
| KP164 | K1 | *wcaG*, *magA*, *rmpA*, *kfu*, *iro*, *entB*, *irp1, alls,* *clbA*, *clbB,* *clbN* |
| KP188 | K1 | *wcaG*, *magA*, *rmpA*, *kfu*, *iro*, *entB*, *irp1, aero, alls,* *clbA*, *clbB,* *clbN* |
